# Supplementary material for: Ultraviolet emission of amorphous SiO2+x nanowires with connected bead-chain morphology
Source: Royal Society of Chemistry journal article supplement (doi:10.1039/c3ra47455k), 2014-01-01
Supplement: c3ra47455k1.pdf [file c3ra47455k1.pdf]

# Ultraviolet emission of amorphous $\text{SiO}_{2+x}$ nanowires with connected bead-chain morphology

Hui Cao, Yin Zhang and Renchao Che\*

Advanced Materials Laboratory and Department of Materials Science,

Fudan University, Shanghai 200438, P. R. China.

## Electronic Supplementary Information

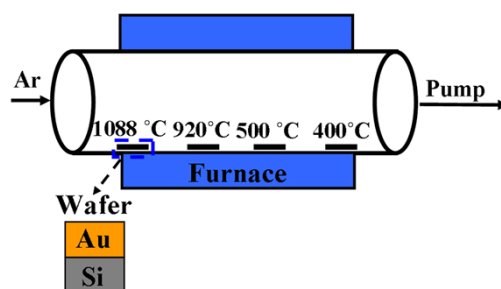

Fig. S1 Schematic of the experimental set up for growth of  $\text{SiO}_{2+x}$  nanowires in a horizontal tube furnace with different temperatures.

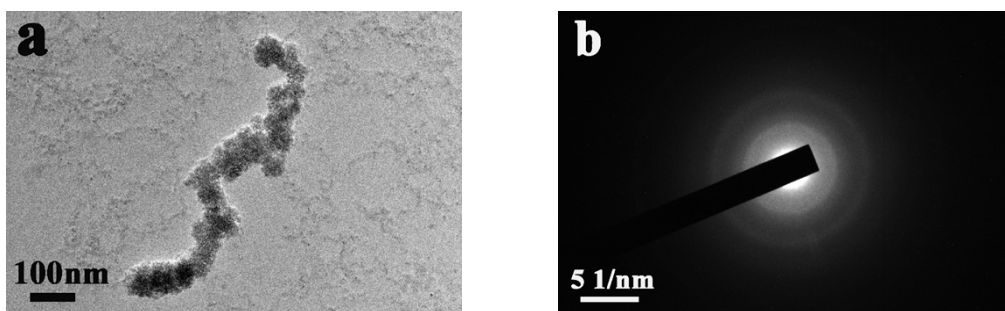

Fig. S2 (a) TEM image of  $\text{SiO}_{2+x}$  nanowire prepared at lower temperature ( $\sim 400^\circ\text{C}$ ). (b) The corresponding of electron diffraction pattern recorded from the region, showing the nanowire had an amorphous phase structure.

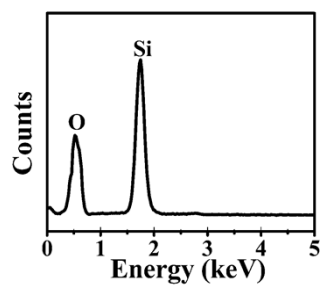

Fig. S3 EDX spectrum of a quartz sample with high purity.

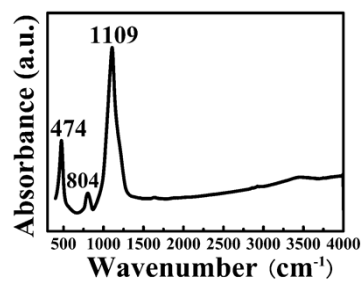

Fig. S4 FTIR spectrum of the SiO<sub>2+x</sub> nanowires prepared at lower temperature (~ 400°C).

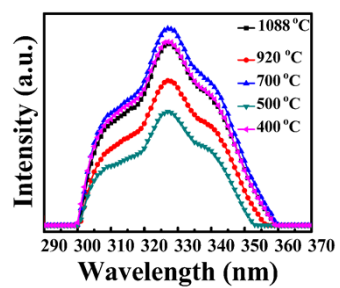

Fig. S5 Photoluminescence spectra of the synthesized SiO<sub>2+x</sub> nanowires grown at different temperatures.
